# Supplementary material for: Dysfunctional Attitudes Mediate the Relationship Between Childhood Emotional Neglect and Anhedonia in Young Adult Major Depression Patients
Source: Frontiers journal article supplement (doi:10.3389/fpsyt.2022.791230), 2022-01-27
Supplement: Data_Sheet_1.PDF [file Data_Sheet_1.PDF]

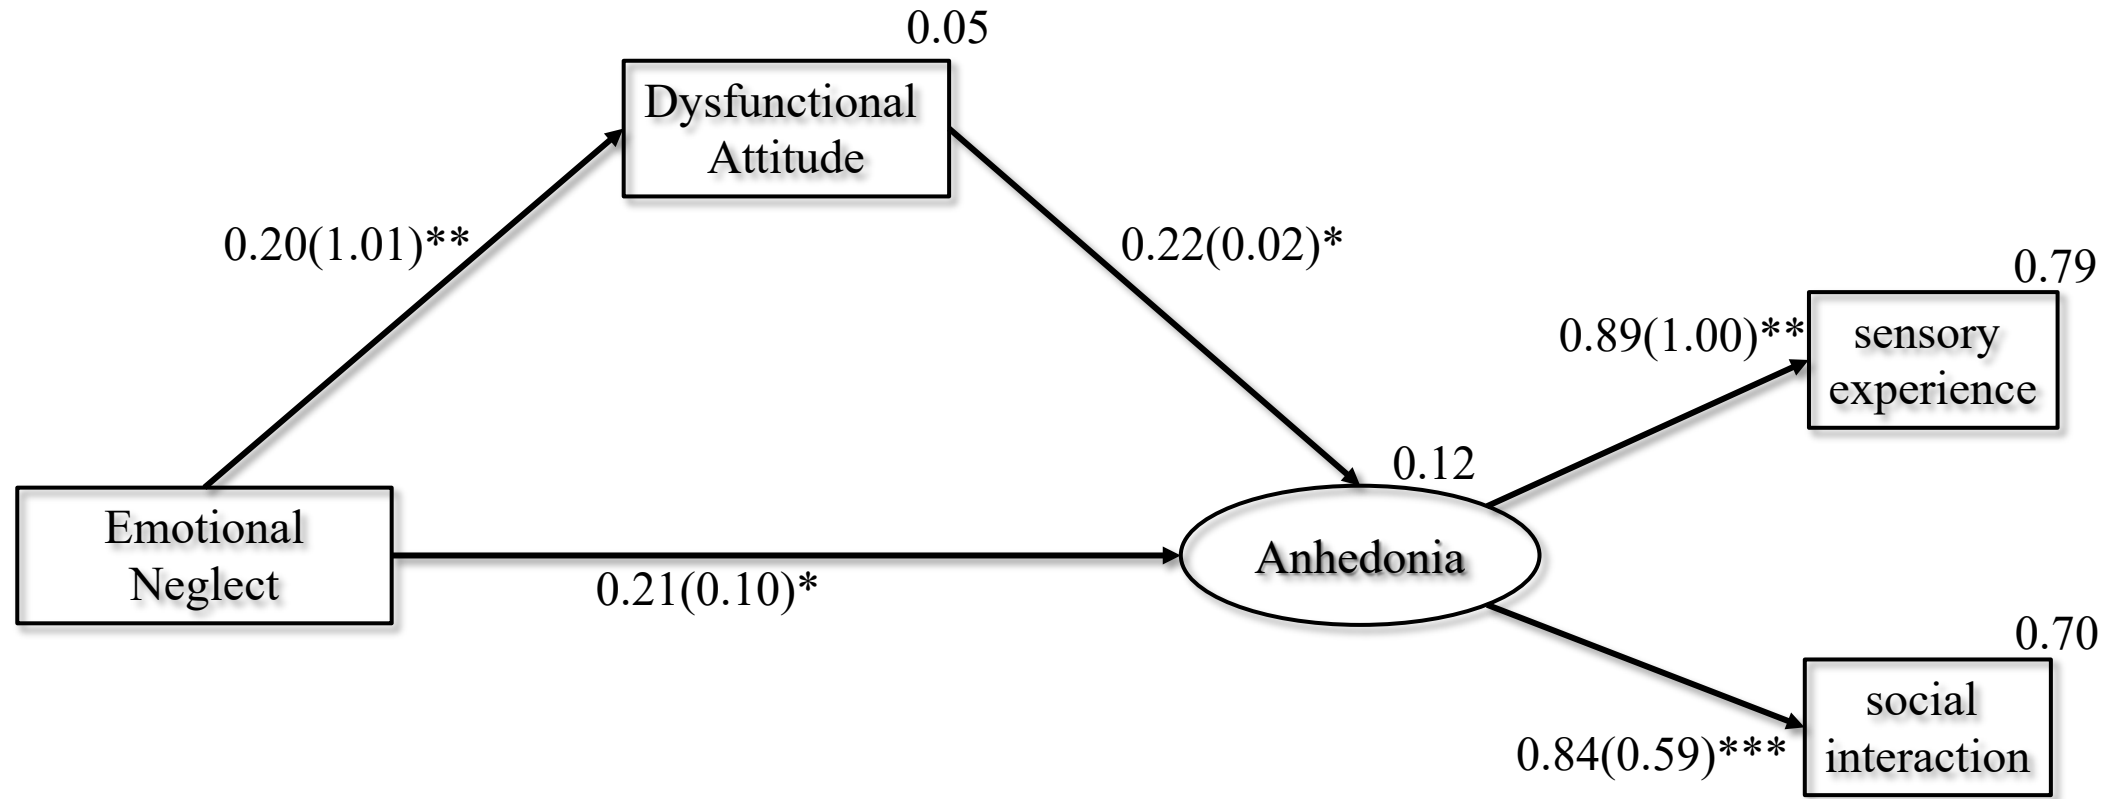

**Supplementary Figure 1.** Final path model for female with the standardized and unstandardized coefficients presented in the parentheses.

$\chi^2/df = 1.463$ , GFI = 0.993, CFI = 0.994, RMSEA = 0.044, SRMR = 0.0216

\* $p < 0.05$ , \*\* $p < 0.01$ , \*\*\* $p < 0.001$

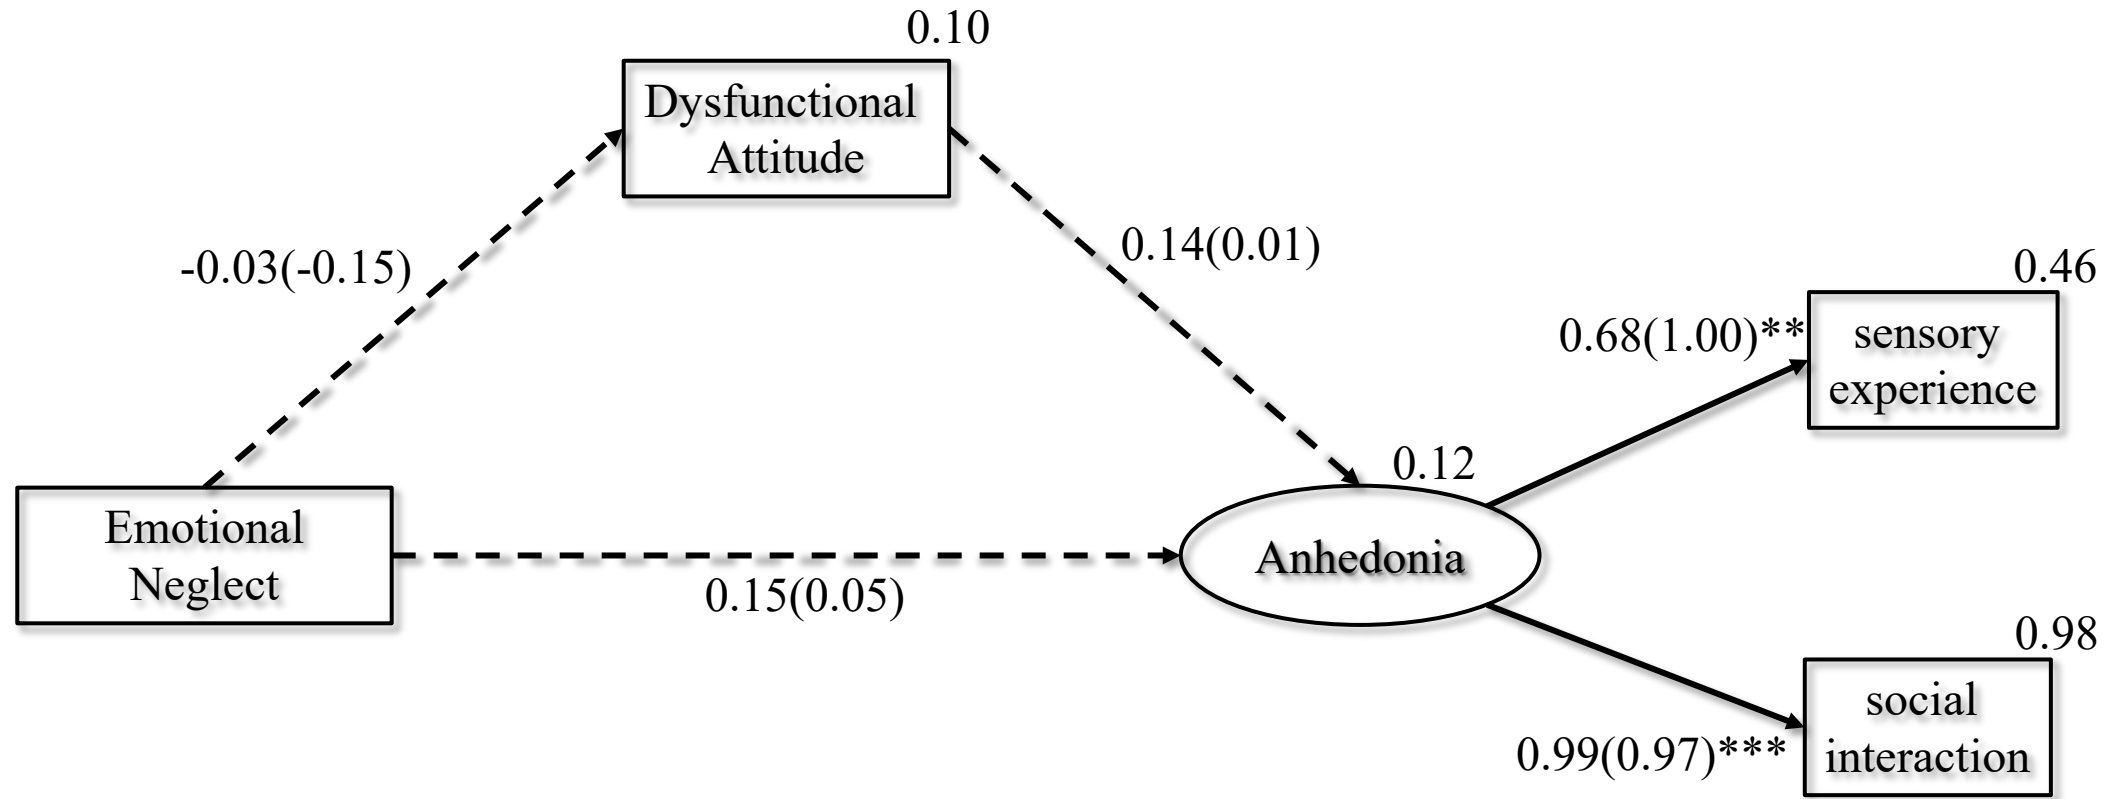

**Supplementary Figure 2.** Final path model for male with the standardized and unstandardized coefficients presented in the parentheses.

$\chi^2/df = 0.918$ , GFI = 0.983, CFI = 1.000, RMSEA = 0.000, SRMR = 0.0378

The dashed line indicates that the path is not significant.

\* $p < 0.05$ , \*\* $p < 0.01$ , \*\*\* $p < 0.001$

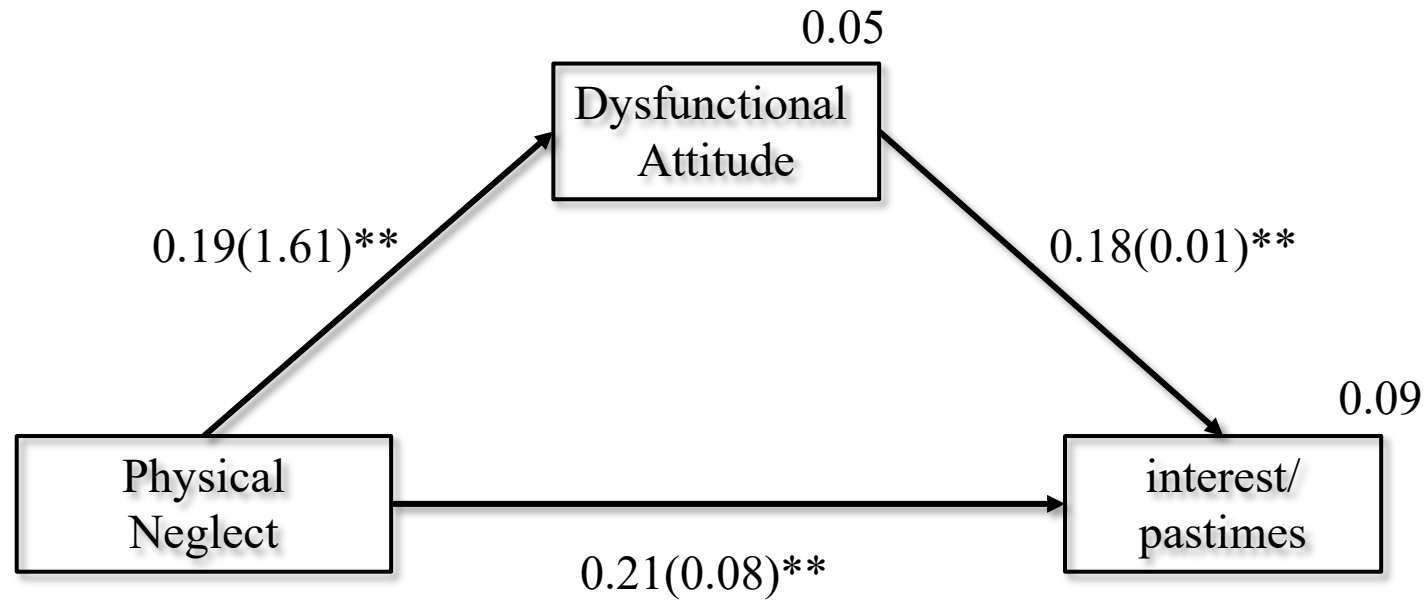

**Supplementary Figure 3.** Final path model for female with the standardized and unstandardized coefficients presented in the parentheses.

$\chi^2/df = 0.809$ , GFI = 0.998, CFI = 1.000, SRMR = 0.0191

\* $p < 0.05$ , \*\*  $p < 0.01$ , \*\*\*  $p < 0.001$

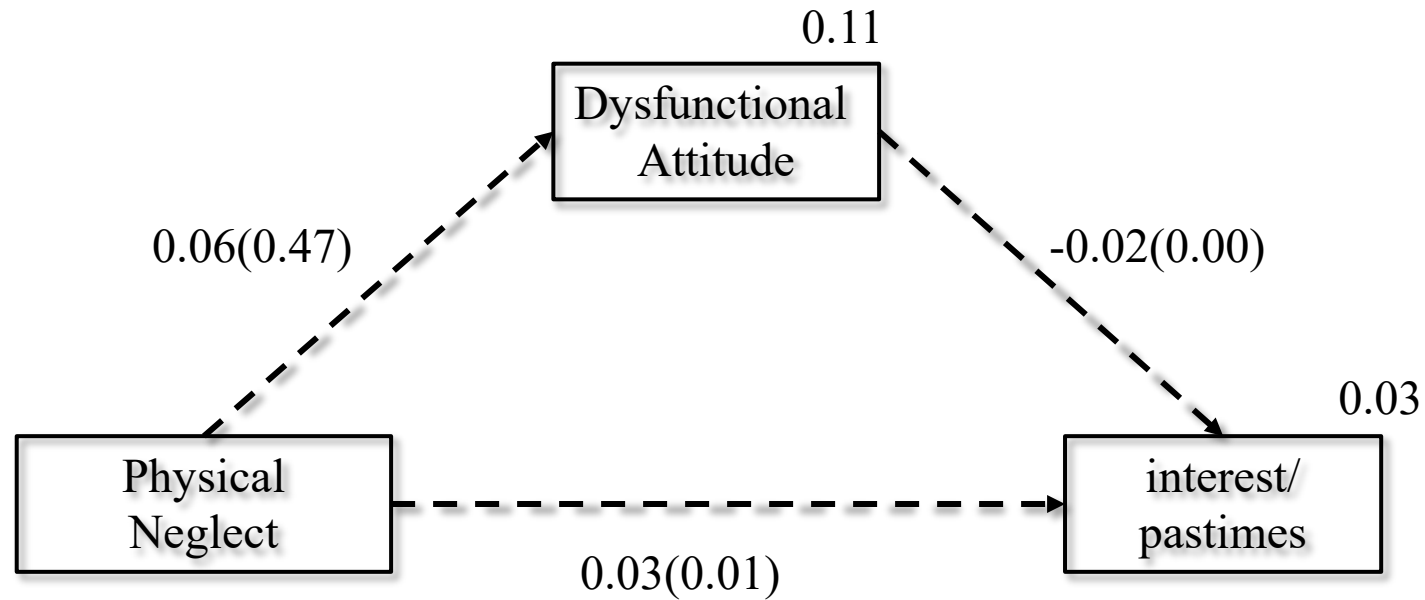

**Supplementary Figure 4.** Final path model for male with the standardized and unstandardized coefficients presented in the parentheses.

$\chi^2/df = 0.068$ , GFI = 0.999, CFI = 1.000, SRMR = 0.0110

The dashed line indicates that the path is not significant.
